# Supplementary material for: Chronic treatment with acetaminophen protects against liver aging by targeting inflammation and oxidative stress
Source: publisher site journal article supplement (doi:10.18632/aging.202884), 2021-03-29
Supplement: Supplementary file [file aging-v13i6-202884-supplementary-material-SD1.pdf]

SUPPLEMENTARY FIGURES

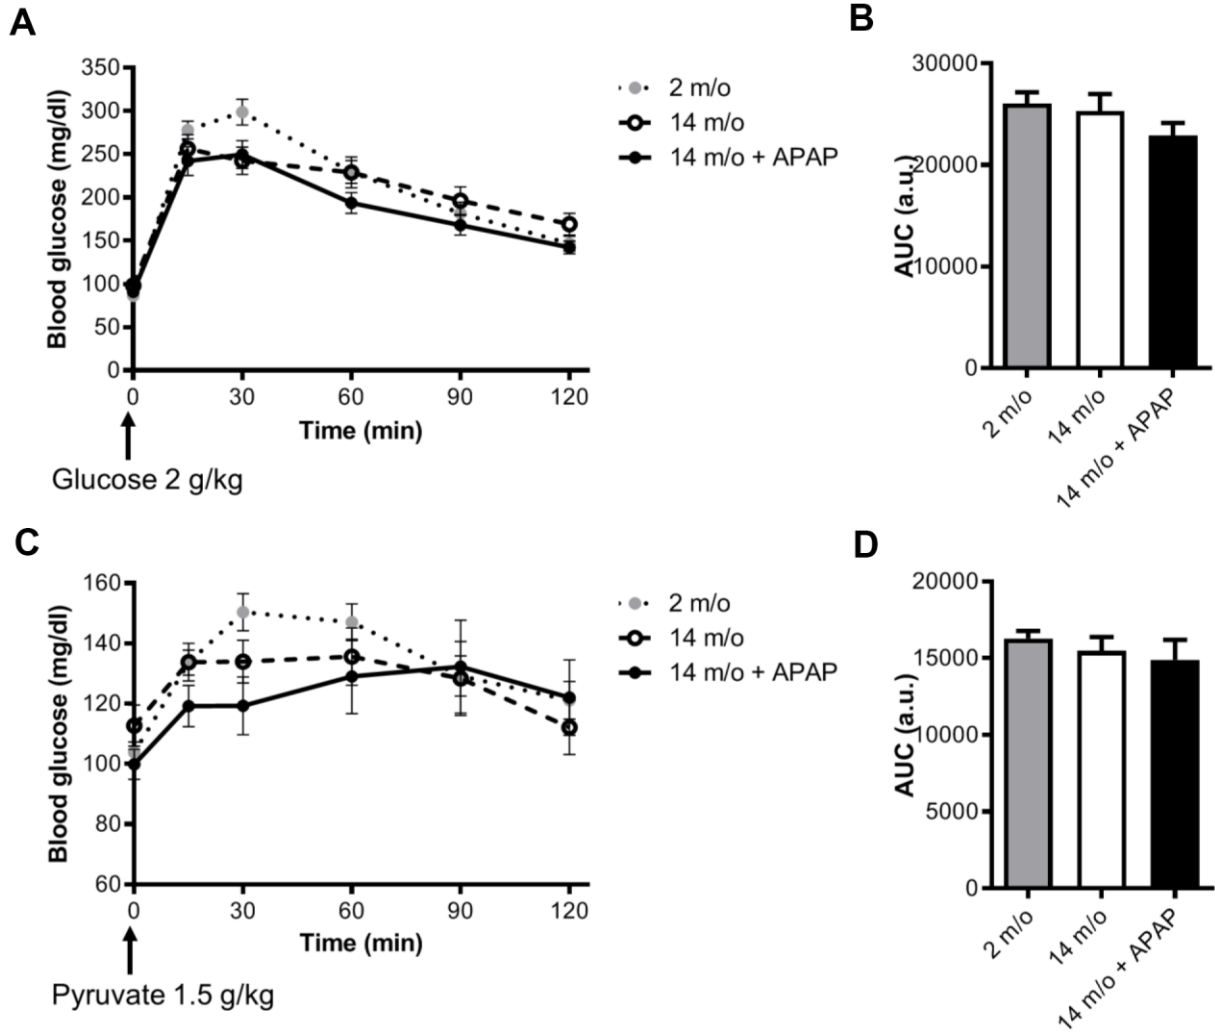

**Supplementary Figure 1. Chronic APAP exposure at an infratherapeutic dose did not alter glucose homeostasis in 14 m/o mice.** (A) GTT from 2 m/o, 14 m/o and 14 m/o + APAP mice. Values showing blood glucose (mg/dl) correspond to mean  $\pm$  S.E.M. (n = 18-22 mice per group). (B) Graph depicts the area under the curve (AUC) from (A). (C) PTT from 2 m/o, 14 m/o and 14 m/o + APAP mice. Values showing blood glucose (mg/dl) correspond to mean  $\pm$  S.E.M. (n = 17-22 mice per group). (D) Graph depicts the area under the curve (AUC) from (C).

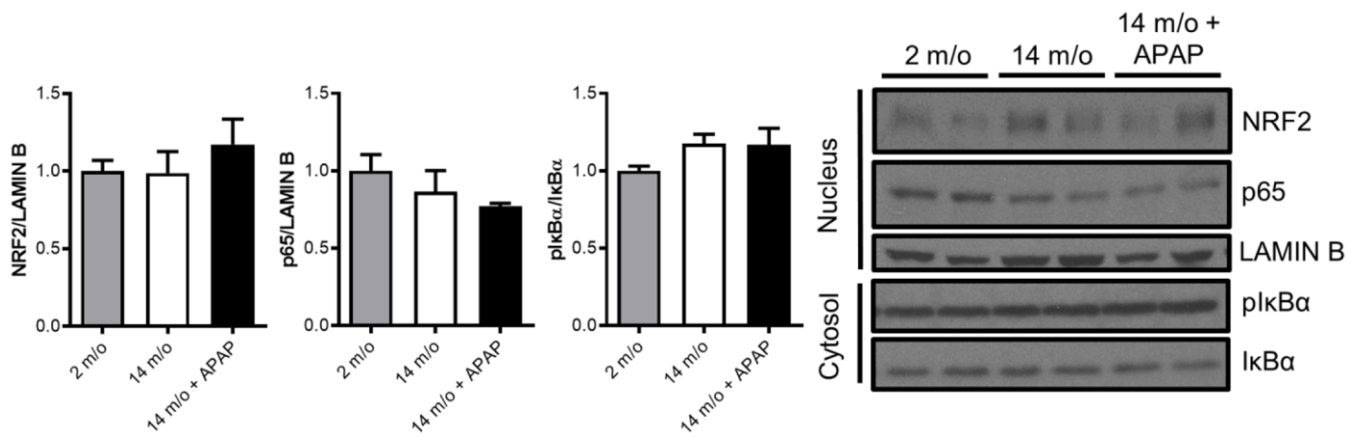

**Supplementary Figure 2. Impact of chronic APAP treatment in NRF2 and NF-κB signaling pathways.** Representative immunoblots showing nuclear NRF2 and p65-NF-κB level using LAMIN B as a loading control, and cytosolic p-IκBα vs. total IκBα. Graphs depict densitometric quantifications of the indicated protein levels. Values are mean ± S.E.M. (n = 6-8 mice per group) (see original western blot in Supplementary Figure 8). Statistical analysis was performed by one-way ANOVA or Brown-Forsythe and Welch ANOVA test followed by their respective post-hoc test.

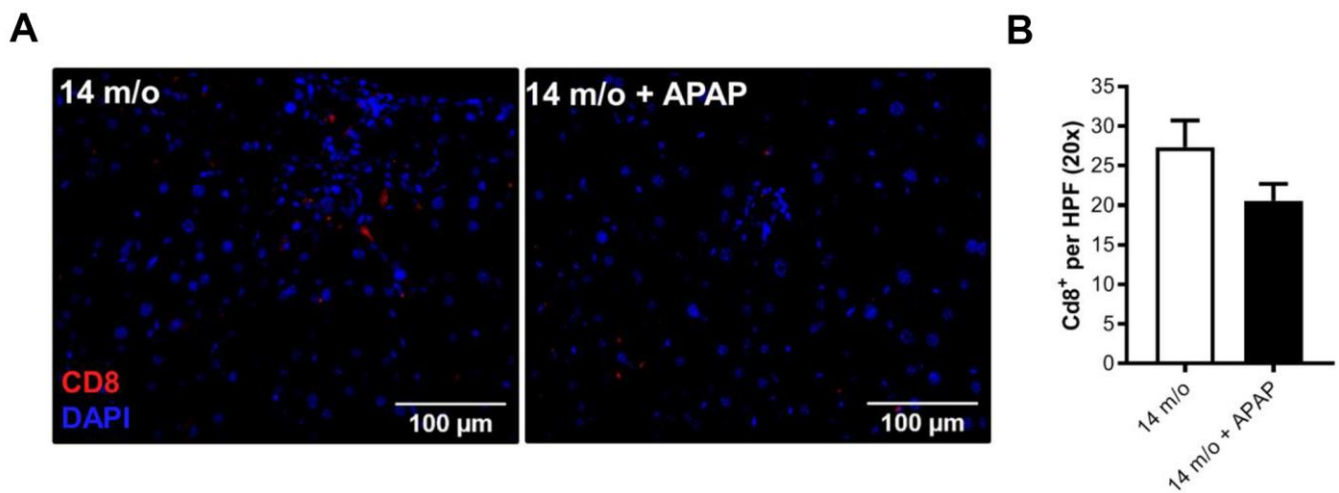

**Supplementary Figure 3. Quantification of Cd8 positive cells in liver sections from 14 m/o and 14 m/o + APAP mice by immunofluorescence.** (A) Representative images of anti-Cd8 staining performed on various livers cryosections from 14 m/o and 14 m/o + APAP mice. (B) Quantification of Cd8+ cells per HPF (High Power Field). Data are represented as the mean ± S.E.M. (n = 4-6 mice per group). Statistical analysis was performed by Mann-Whitney U test.

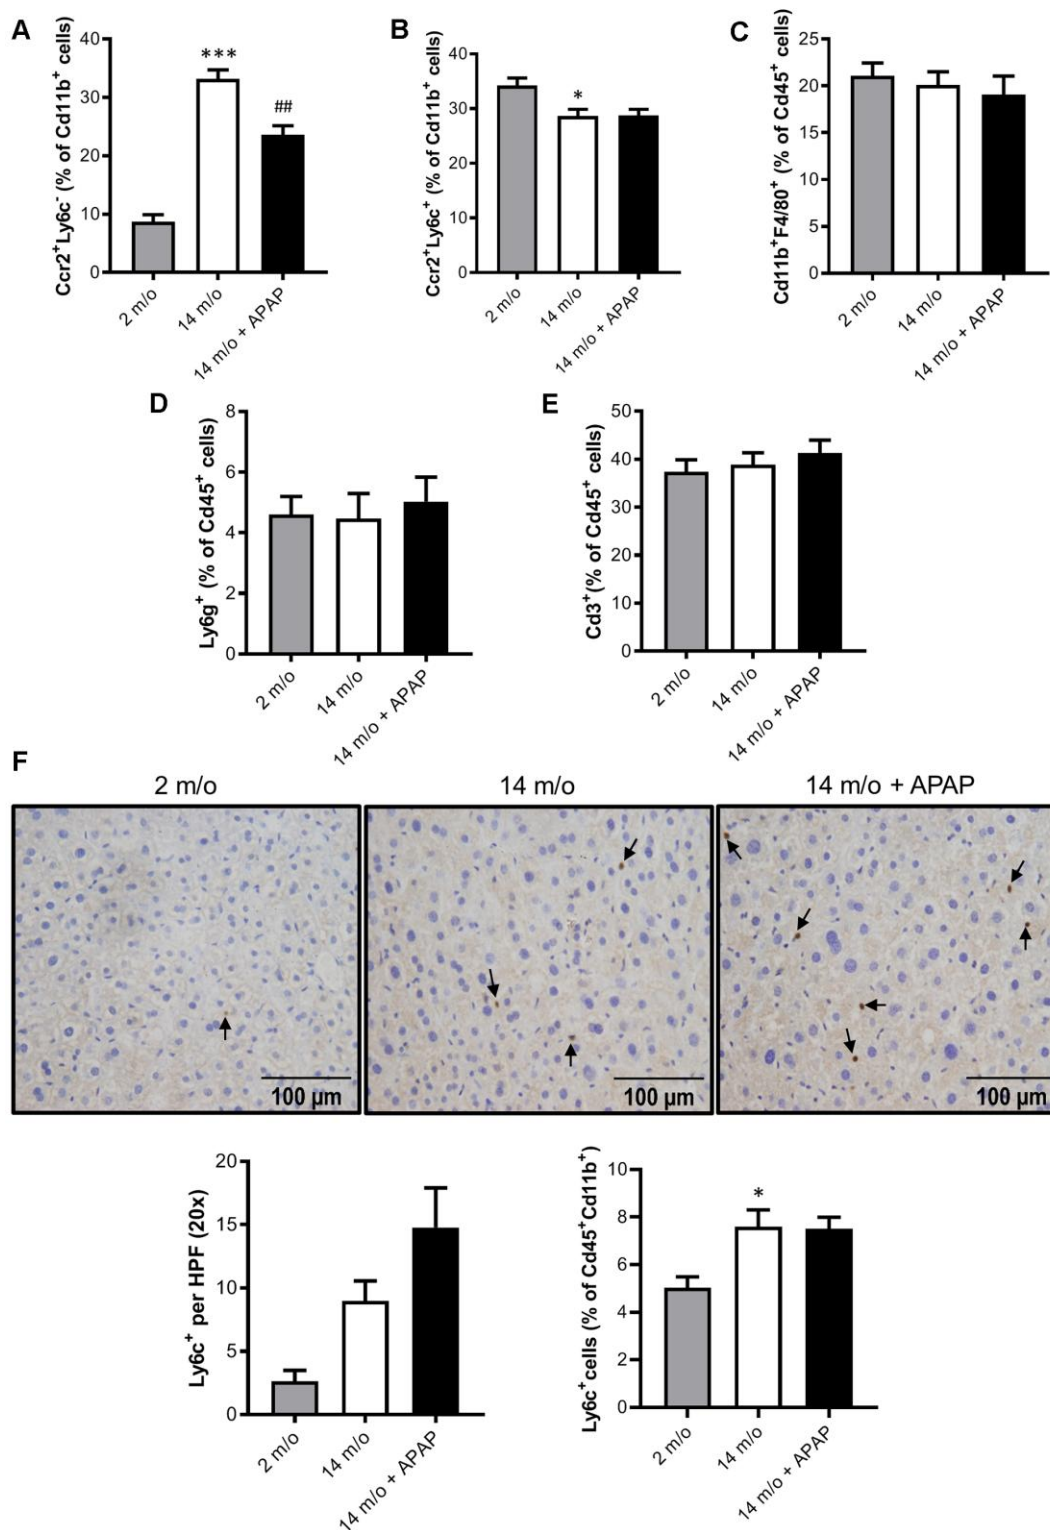

**Supplementary Figure 4. Aging and chronic APAP treatment did not affect non-lymphoid populations in NPCs.** Analysis of different inflammatory populations in liver NPCs from 2 m/o, 14 m/o and 14 m/o + APAP mice by flow cytometry. (A) Percentage of Ccr2<sup>+</sup>Ly6c<sup>-</sup> cells from Cd11b<sup>+</sup> cells. (B) Percentage of Ccr2<sup>+</sup>Ly6c<sup>+</sup> cells from Cd11b<sup>+</sup> cells. (C) Percentage of Cd11b<sup>+</sup>F4/80<sup>+</sup> cells from Cd45<sup>+</sup> cells. (D) Percentage of Ly6g<sup>+</sup> from Cd45<sup>+</sup> cells. (E) Percentage of Cd3<sup>+</sup> cells from Cd45<sup>+</sup> cells. (F) Ly6c<sup>+</sup> per HPF (High Power Field) immunostaining (left) and analysis of total Ly6c<sup>+</sup> cells from Cd45<sup>+</sup>Cd11b<sup>+</sup> cells by flow cytometry (right). Data are represented as the mean ± S.E.M. (n = 5-16 mice per group). Statistical analysis was performed by Kruskal-Wallis, one-way ANOVA or Brown-Forsythe and Welch ANOVA test followed by their respective post-hoc test. \*  $P < 0.05$  and \*\*\*  $P < 0.001$  vs. 2 m/o; ##  $P < 0.01$  vs. 14 m/o.

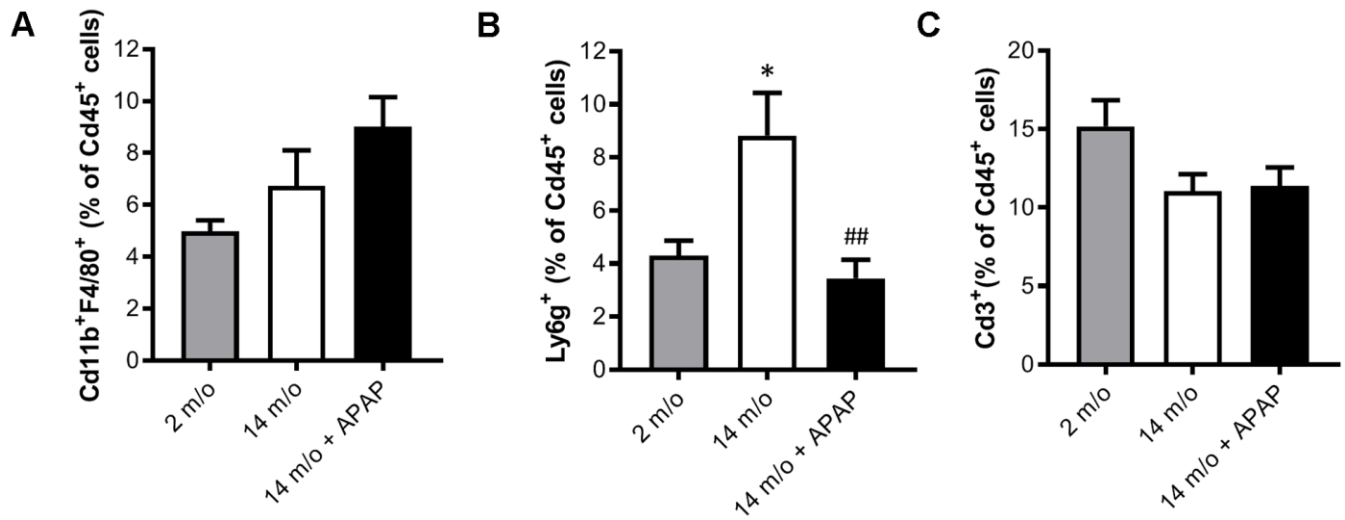

**Supplementary Figure 5. Analysis of non-lymphoid inflammatory population in PBMCs from 2 m/o, 14 m/o and 14 m/o + APAP mice by flow cytometry.** (A) Percentage of Cd11b<sup>+</sup>F4/80<sup>+</sup> cells from Cd45<sup>+</sup> cells. (B) Percentage of Ly6g<sup>+</sup> from Cd45<sup>+</sup> cells. (C) Percentage of Cd3<sup>+</sup> cells from Cd45<sup>+</sup> cells. Data are represented as the mean ± S.E.M. (n = 9-14 mice per group). Statistical analysis was performed by Kruskal-Wallis or Brown-Forsythe and Welch ANOVA test followed by their respective post-hoc test. \*  $P < 0.05$  vs. 2 m/o; ##  $P < 0.01$  vs. 14 m/o.

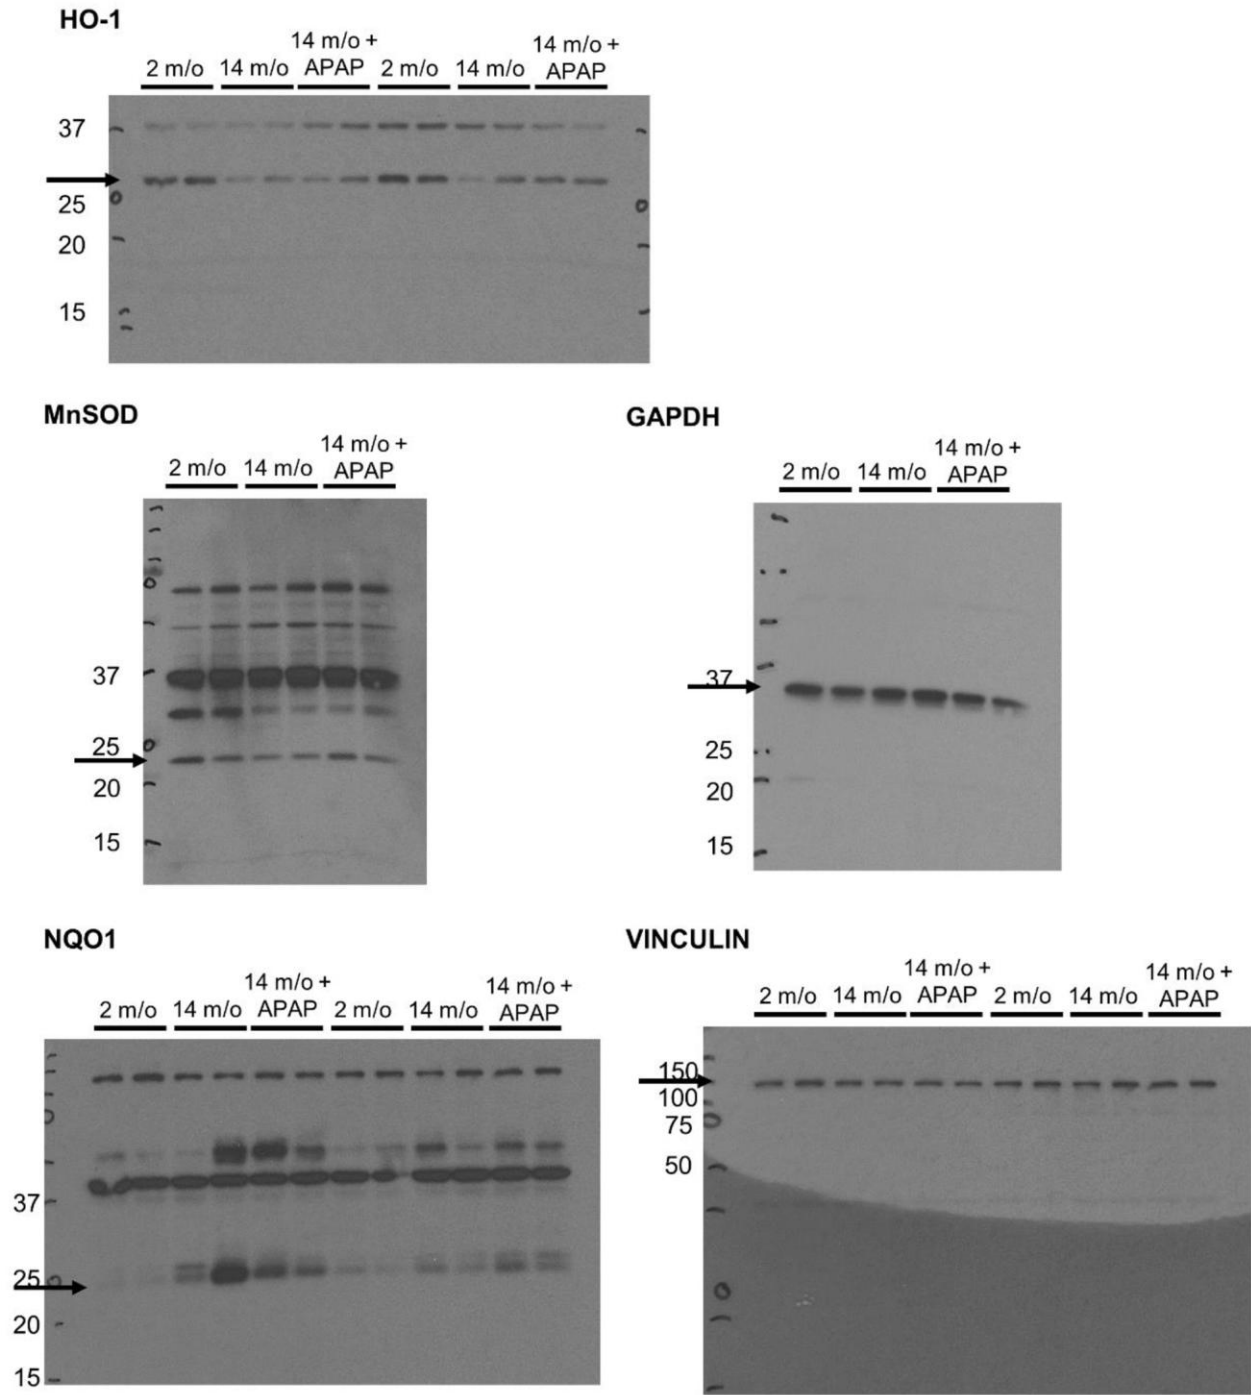

Supplementary Figure 6. Data from Figure 3A.

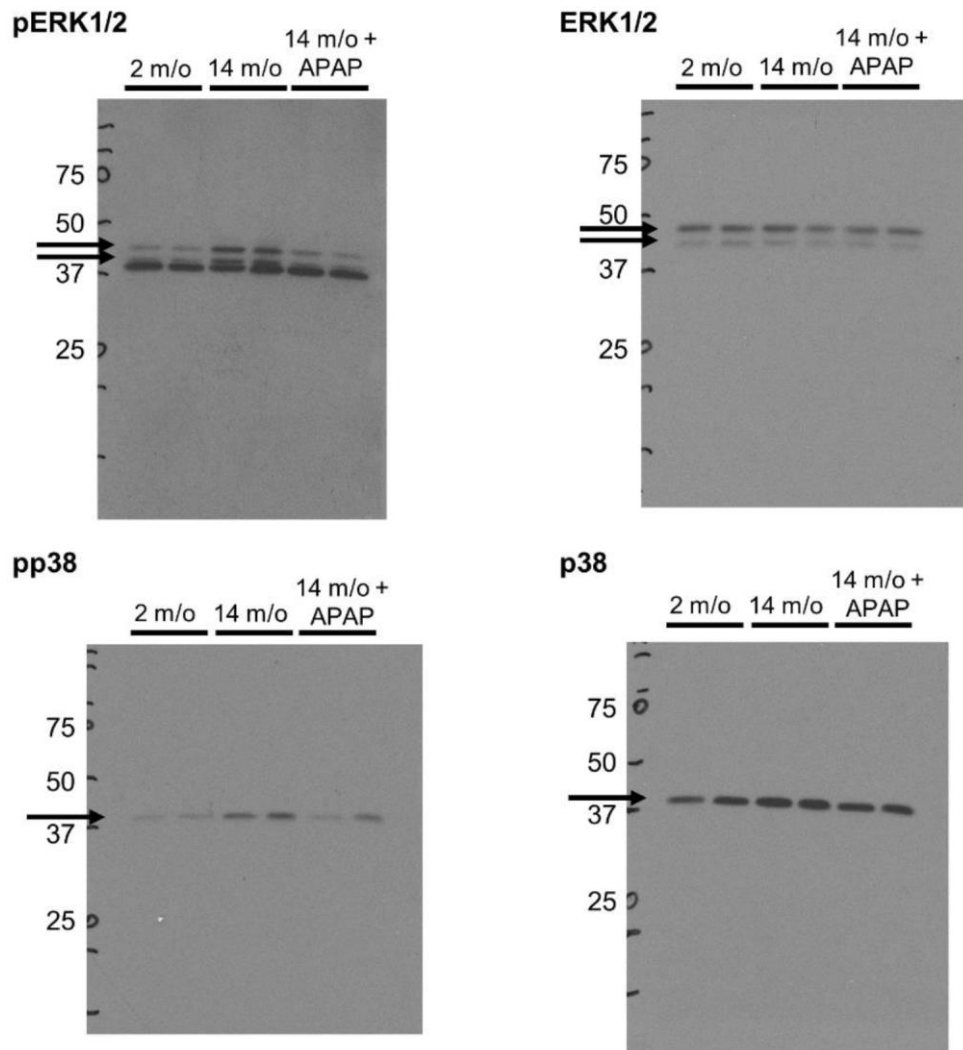

Supplementary Figure 7. Data from Figure 3E.

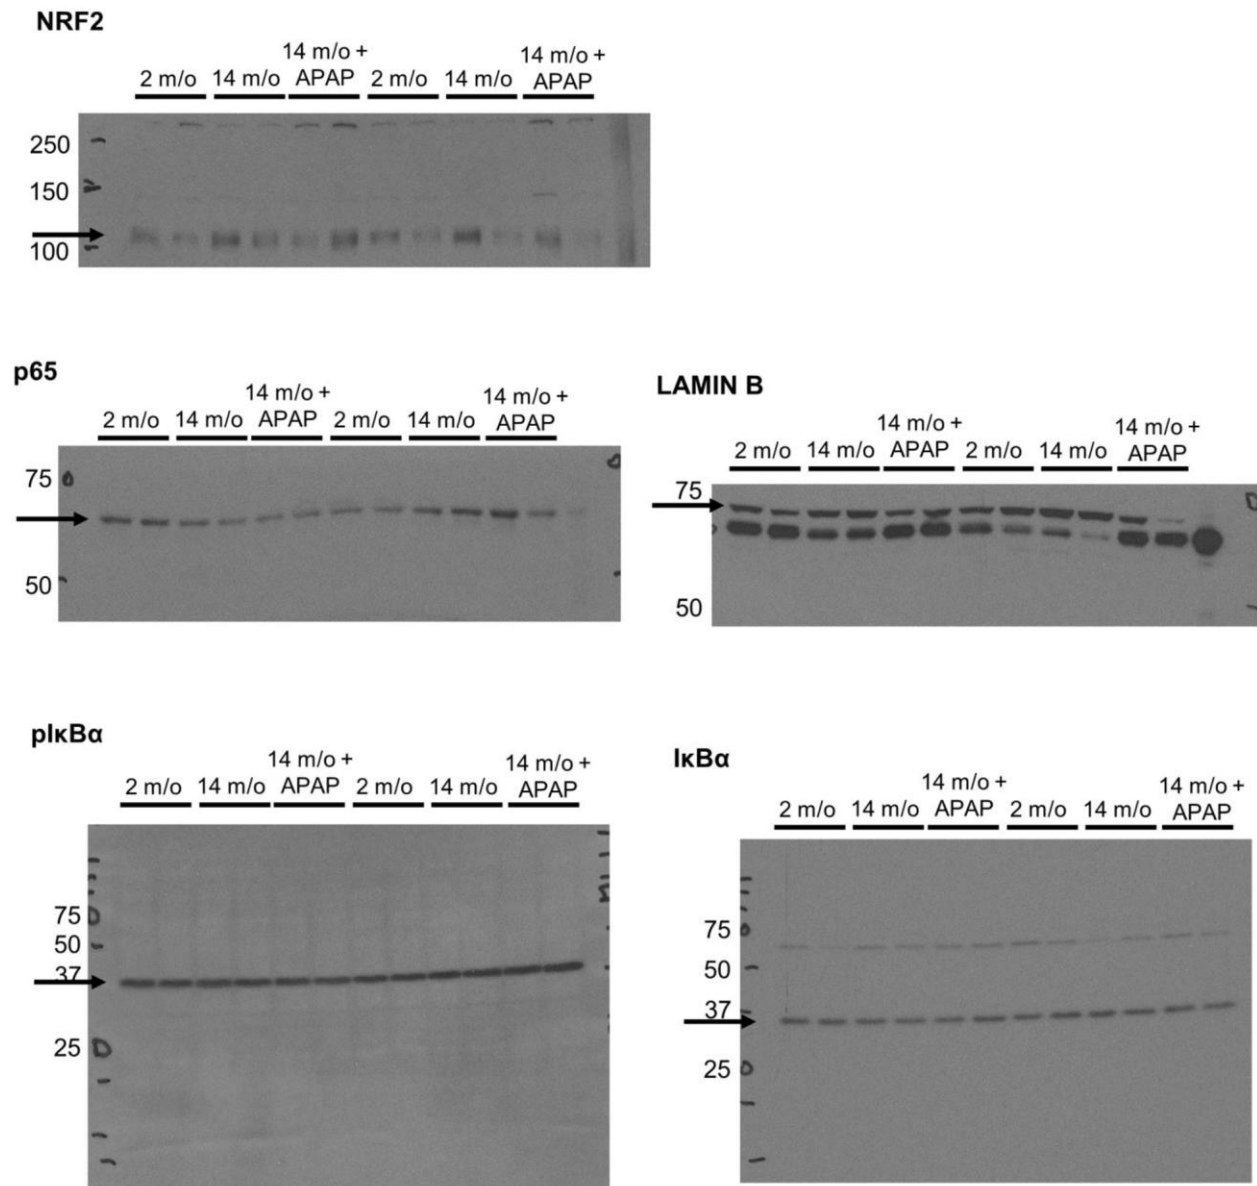

Supplementary Figure 8. Data from Supplementary Figure 2.
